# Supplementary material
Source: PubMed Central journal article supplement (PMC8744488)
Supplement: NIHMS1767918-supplement-pmeaac38c0supp1_pdf.pdf [file NIHMS1767918-supplement-pmeaac38c0supp1_pdf.pdf]

## Supplementary information for

### Nonhomogeneous volume conduction effects affecting needle electromyography: an analytical and simulation study

**Xuesong Luo<sup>1,3</sup>, Shaoping Wang<sup>1</sup>, Seward B. Rutkove<sup>2</sup> and Benjamin Sanchez<sup>3</sup> ‡**

<sup>1</sup>Department of Automation Science and Electric Engineering, Beijing Advanced Innovation Center for Big Data-Based Precision Medicine, Beihang University, Beijing 100083, China.

<sup>2</sup>Department of Neurology, Beth Israel Deaconess Medical Center, Harvard Medical School, Boston, MA 02215, USA.

<sup>3</sup>Sanchez Research Lab, Department of Electrical and Computer Engineering, University of Utah, Salt Lake City, UT 84112-9206, USA.

E-mail: [benjamin.sanchez@utah.edu](mailto:benjamin.sanchez@utah.edu)

This PDF file includes Supplementary Parts A, B and C.

‡ Corresponding author: Dr. Benjamin Sanchez, Sorenson Molecular Biotechnology Building, Office 3721, 36 South Wasatch Drive, University of Utah, Salt Lake City, UT 84112-9206, USA, phone: (801) 585-9535, email: [benjamin.sanchez@utah.edu](mailto:benjamin.sanchez@utah.edu).

## Part A. Lemma 1

Surface  $\Psi$  is an infinity plane in  $\mathbb{R}^3$ , which divide full space into two domains  $\Omega_1$  and  $\Omega_2$ . Point  $Q$  at position  $\mathbf{r}_Q$  is on  $\Psi$  (i.e.,  $\mathbf{r}_Q \in \Psi$ ), while two different points  $S$  at  $\mathbf{r}_S$  and  $E$  at  $\mathbf{r}_E$  are arbitrarily located in  $\mathbb{R}^3$  (see Figure A1 A and B). When  $S$  and  $E$  are inside the same domain, point  $S'$  at  $\mathbf{r}_{S'}$  is the mirrored point of  $S$  with respect to plane  $\Psi$ . Vector  $\mathbf{n}_{21}(\mathbf{r}_Q)$  is a normal vector of surface  $\Psi$  at  $\mathbf{r}_Q$  pointing from  $\Omega_2$  to  $\Omega_1$ . Then the 1st-order geometrical parameter  $K_\Psi^{(1)}(\mathbf{r}_E, \mathbf{r}_S)$  defined in (9) can be calculated for planar boundary as

$$\begin{aligned} & -\frac{1}{2\pi} \iint_{\Psi} \frac{\partial(|\mathbf{r}_Q - \mathbf{r}_S|)}{\partial \mathbf{n}_{21}(\mathbf{r}_Q)} \cdot \frac{\mathbf{n}_{21}(\mathbf{r}_Q) d\Psi(\mathbf{r}_Q)}{|\mathbf{r}_Q - \mathbf{r}_S|^2 |\mathbf{r}_E - \mathbf{r}_Q|} \\ & = \begin{cases} 0 & \text{if } \mathbf{r}_S \text{ on } \Psi \\ \frac{(-1)^{i-1}}{|\mathbf{r}_E - \mathbf{r}_{S'}|} & \text{if } \mathbf{r}_S \text{ and } \mathbf{r}_E \text{ in } \Omega_i \\ \frac{(-1)^{i-1}}{|\mathbf{r}_E - \mathbf{r}_S|} & \text{else } \mathbf{r}_S \text{ in } \Omega_i \text{ and } \mathbf{r}_E \text{ in } \Omega_{3-i} \text{ or on } \Psi, \end{cases} \end{aligned} \quad (\text{A1})$$

where  $i \in \{1, 2\}$ .

*Proof.* Here we introduce an auxiliary model of a charged plane  $\Psi$  in vacuum to prove (A1) indirectly. Considering plane  $\Psi$  as  $z = 0$  in Cartesian coordinates  $(x, y, z)$  originated at point  $C$  with coordinates  $\mathbf{r}_C = (0, 0, 0)$ . First, we place point  $S$  on the  $z$ -axis at  $\mathbf{r}_S = (0, 0, z_S)$ . Point  $E$  at  $\mathbf{r}_E := (0, y_E, z_E)$  is placed on the plane  $x = 0$ . An arbitrary point  $Q$  is placed on plane  $\Psi$  at  $\mathbf{r}_Q := (x, y, 0)$ . Next, we assume that a charge density function  $q(\mathbf{r}_Q) \in \mathbb{R}$  ( $\text{C m}^{-2}$ ) is distributed across the surface  $\Psi$ , defined as

$$q(\mathbf{r}_Q) := \frac{\partial(|\mathbf{r}_Q - \mathbf{r}_S|)}{\partial \mathbf{n}_{21}(\mathbf{r}_Q)} \cdot \frac{\mathbf{n}_{21}(\mathbf{r}_Q)}{|\mathbf{r}_Q - \mathbf{r}_S|^2}.$$

The existence of  $q(\mathbf{r}_Q)$  on the entire charged plane  $\Psi$  leads to a static electrical potential distribution  $U(\mathbf{r}) \in \mathbb{R}$  (V) in  $\mathbb{R}^3$ . Then the static electrical potential evaluated at  $\mathbf{r}_E$  is deduced as

$$U(\mathbf{r}_E) = \frac{1}{4\pi\epsilon_0} \iint_{\Psi} q(\mathbf{r}_Q) \frac{d\Psi(\mathbf{r}_Q)}{|\mathbf{r}_E - \mathbf{r}_Q|}, \quad (\text{A2})$$

which is similar to the left hand side of (A1). Thereby, one can prove (A1) with the solution to static electrical potential  $U(\mathbf{r}_E)$ . Next, we derive the expression of  $U(\mathbf{r}_E)$  based on (1)  $\mathbf{r}_S$  on  $\Psi$  (2)  $\mathbf{r}_S$  and  $\mathbf{r}_E$  in the same domain  $\Omega_i$  (3)  $\mathbf{r}_S$  in  $\Omega_i$  and  $\mathbf{r}_E$  in  $\Omega_{3-i}$  or on  $\Psi$ .

### 1.1 Point $S$ and $E$ in the same domain

To obtain the expression of electrical potential at arbitrary position  $\mathbf{r}_E$ , an auxiliary point  $E'$  at  $\mathbf{r}_{E'} := (0, 0, \text{sgn}(z_E)R_E)$  on  $z$ -axis is introduced (see Figure A1 A), where  $R_E := |\mathbf{r}_E - \mathbf{r}_C|$  is the distance of line segment  $|EC|$  and  $\text{sgn}(x)$  is the sign function. Since this model has axial symmetry with respect to  $z$ -axis, the general solution to  $U(\mathbf{r}_E)$  then satisfies

$$U(\mathbf{r}_E) = \sum_{n=0}^{\infty} \left( A_n R_E^n + \frac{B_n}{R_E^{n+1}} \right) P_n(\cos \theta_C), \quad (\text{A3})$$

where  $A_n, B_n$  are a series of constants;  $\theta_C \in [0, \pi]$  ( $\text{rad s}^{-1}$ ) is the angle between line segments  $|SC|$  and  $|EC|$ ;  $P_n(x)$  are Legendre polynomials. When  $E$  and  $E'$  are overlap (i.e.,  $\theta_C = 0$ ),

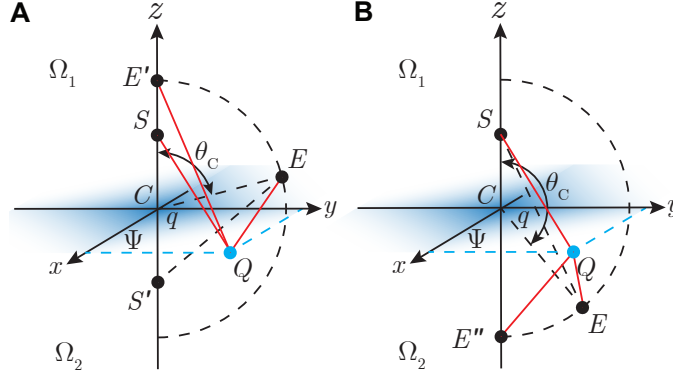

**Figure A1.** Auxiliary model of charged plane  $\Psi : z = 0$  in vacuum. Boundary  $\Psi$  divide  $\mathbb{R}^3$  into two domains  $\Omega_1 : z \geq 0$  and  $\Omega_2 : z \leq 0$ . Position  $S$  with coordinates  $\mathbf{r}_S := (0, 0, z_S)$  is on the positive  $z$ -axis of the Cartesian coordinates originated at point  $C$ . The position  $Q$  has coordinates  $\mathbf{r}_Q := (x, y, 0)$  is an arbitrary point on plane  $\Psi$ . The charge density  $q(\mathbf{r}_Q)$  is distributed on  $\Psi$ . Positions  $E, E'$  and  $E''$  are three points on the plane  $x = 0$ , which satisfy the line segments  $|EC| = |E'C| = |E''C|$ . Point  $E'$  is on the positive  $z$ -axis (A) while  $E''$  is on the negative  $z$ -axis (B). Angle  $\theta_C$  is the angle between line segments  $|SC|$  and  $|EC|$ . Point  $S'$  at  $(0, 0, -z_S)$  is a mirrored point of  $S$  with respect to  $\Psi$  in (A).

then (A3) is rewritten as

$$U(\mathbf{r}_{E'}) = \sum_{n=0}^{\infty} \left( A_n R_E^n + \frac{B_n}{R_E^{n+1}} \right). \quad (\text{A4})$$

According to (A2) in Cartesian coordinates, electrical potential at  $E'$  can also be expressed as

$$U(\mathbf{r}_{E'}) = \frac{1}{4\pi\epsilon_0} \int_{-\infty}^{\infty} \int_{-\infty}^{\infty} -\frac{\partial R_{SQ}}{\partial z_S} \frac{dx dy}{R_{SQ}^2 R_{QE'}}, \quad (\text{A5})$$

in which  $R_{SQ} := |\mathbf{r}_Q - \mathbf{r}_S| = \sqrt{x^2 + y^2 + z_S^2}$  is the distance between  $S$  and  $Q$ ;  $R_{QE'} := |\mathbf{r}_{E'} - \mathbf{r}_Q| = \sqrt{x^2 + y^2 + R_E^2}$  is the distance between  $Q$  and  $E'$ . Equation (A5) can be further simplified as

$$U(\mathbf{r}_{E'}) = -\frac{\text{sgn}(z_S)}{2\epsilon_0} \frac{1}{|z_S| + R_E}. \quad (\text{A6})$$

When  $|z_S| \neq R_E$ , (A6) can be rewritten using Taylor series as

$$U(\mathbf{r}_{E'}) = \begin{cases} -\frac{\text{sgn}(z_S)}{2\epsilon_0 R_E} \sum_{n=0}^{\infty} \left( -\frac{|z_S|}{R_E} \right)^n & \text{if } R_E > |z_S| \\ -\frac{\text{sgn}(z_S)}{2\epsilon_0 |z_S|} \sum_{n=0}^{\infty} \left( -\frac{R_E}{|z_S|} \right)^n & \text{if } R_E < |z_S|. \end{cases} \quad (\text{A7})$$

Comparing (A7) with (A4) we have

$$\begin{cases} A_n = 0, B_n = -\frac{\text{sgn}(z_S)}{2\epsilon_0} (-|z_S|)^n & \text{if } R_E > |z_S| \\ A_n = \frac{\text{sgn}(z_S)}{2\epsilon_0} (-|z_S|)^{-n-1}, B_n = 0 & \text{if } R_E < |z_S|. \end{cases} \quad (\text{A8})$$

Then, the Legendre polynomials can also be written as

$$\frac{1}{\sqrt{x^2 - 2xt + 1}} = \sum_{n=0}^{\infty} x^n P_n(t), \quad (\text{A9})$$

which we can plug into (A3) using (A8) as well to obtain

$$U(\mathbf{r}_E) = -\frac{\text{sgn}(z_S)}{2\varepsilon_0\sqrt{R_E^2 - 2R_E|z_S|\cos(\pi - \theta_C) + z_S^2}}. \quad (\text{A10})$$

When  $|z_S| = R_E$ , then

$$U(\mathbf{r}_E)|_{|z_S|=R_E} \in \left[ \lim_{\Delta \rightarrow 0} U(\mathbf{r}_E)|_{|z_S|=R_E-\Delta}, \lim_{\Delta \rightarrow 0} U(\mathbf{r}_E)|_{|z_S|=R_E+\Delta} \right].$$

According to (A10) and the Squeeze theorem, (A10) also satisfies that  $|z_S| = R_E$ .

As illustrated in Figure A1 A, we introduce an auxiliary point  $S'$  at  $\mathbf{r}_S = (0, 0, -z_S)$  to simplify (A10). Point  $S'$  is the mirrored image of  $S$  with respect to plane  $\Psi$ . Then the distance between  $S'$  and  $E$  is described as

$$R_{S'E} := |\mathbf{r}_E - \mathbf{r}_{S'}| = \sqrt{R_E^2 - 2R_E|z_S|\cos(\pi - \theta_C) + z_S^2}.$$

Finally, we can write the electrical potential at  $\mathbf{r}_E$  as

$$U(\mathbf{r}_E) = -\frac{\text{sgn}(z_S)}{2\varepsilon_0 R_{S'E}}. \quad (\text{A11})$$

### 1.2 Point $E$ on plane $\Psi$ or in different domain from $S$

To obtain the expression of electrical potential at arbitrary position  $\mathbf{r}_E$ , an auxiliary point  $E''$  at  $\mathbf{r}_{E''} := (0, 0, \text{sgn}(z_E)R_E)$  on  $z$ -axis is introduced (see Figure A1 B). When  $\theta_C = \pi$ , then (A3) is

$$U(\mathbf{r}_{E''}) = \sum_{n=0}^{\infty} (-1)^n \left( A_n R_E^n + \frac{B_n}{R_E^{n+1}} \right). \quad (\text{A12})$$

Replacing  $E'$  with  $E''$  in (A6), the electrical potential at  $E''$  can be re-written as

$$U(\mathbf{r}_{E''}) = \frac{\text{sgn}(z_S)}{2\varepsilon_0} \frac{1}{|z_S| + R_E}. \quad (\text{A13})$$

Similar mathematical operations as (A7) (A8) (A9) (A10) can be performed to (A12) and (A13). Then we can find general expression for electrical potential  $U(\mathbf{r}_E)$ , namely,

$$U(\mathbf{r}_E) = -\frac{\text{sgn}(z_S)}{2\varepsilon_0\sqrt{R_E^2 - 2R_E|z_S|\cos\theta_C + z_S^2}} = -\frac{\text{sgn}(z_S)}{2\varepsilon_0 R_{SE}} \quad (\text{A14})$$

where  $R_{SE} := |\mathbf{r}_E - \mathbf{r}_S| = \sqrt{R_E^2 - 2R_E|z_S|\cos C + z_S^2}$  is the distance between  $S$  and  $E$ .

### 1.3 Point $S$ on plane $\Psi$

From the assumption we have  $\mathbf{r}_S \in \Psi$ . Meanwhile according to the definition of  $\mathbf{r}_Q$ , we can find that  $\mathbf{r}_Q \in \Psi$ . It follows that

$$\frac{\partial(|\mathbf{r}_Q - \mathbf{r}_S|)}{\partial \mathbf{n}_{21}(\mathbf{r}_Q)} \equiv 0.$$

According to (A2) we have

$$U(\mathbf{r}_E) \equiv 0. \quad (\text{A15})$$

One can find (A1) equating the right hand sides of (A11), (A14), (A15) and (A2).

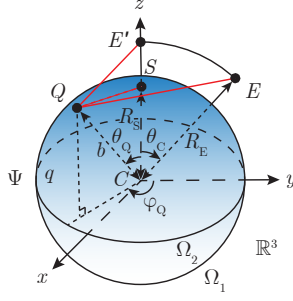

**Figure B1.** Auxiliary model of charged spherical shell in vacuum. A nonuniform charged spherical shell  $\Psi$  is centered at the origin  $C$  of spherical coordinates  $(r, \theta, \varphi)$  in infinity vacuum  $\mathbb{R}^3$  with  $b$  the radius of  $\Psi$ . Boundary  $\Psi$  divide the full space into two domains  $\Omega_1 : r \geq b$  and  $\Omega_2 : r \leq b$ . The position  $Q$  has coordinates  $\mathbf{r}_Q := (b, \theta_Q, \varphi_Q)$  on  $\Psi$ . The charge density  $q(\mathbf{r}_Q)$  is distributed on surface  $\Psi$ . The position  $S$ ,  $E$  and  $E'$  have coordinates  $\mathbf{r}_S := (R_S, 0, 0)$ ,  $\mathbf{r}_E := (R_E, \theta_C, 0)$  and  $\mathbf{r}_{E'} := (R_E, 0, 0)$ , which satisfy  $|EC| = |E'C|$  and  $S$ ,  $E'$  are on positive  $z$ -axis. The length  $R_S$  is the distance between  $S$  and  $C$ ; the length  $R_E$  is the distance between  $E$  and  $C$ . The angle  $\theta_C$  is defined between line segment  $|SC|$  and  $|EC|$ ;  $\theta_Q$  is the angle between line segment  $|SC|$  and  $|EC|$ .

## Part B. Lemma 2

Surface  $\Psi$  is a spherical surface centered at  $C$  with radius  $b$  in  $\mathbb{R}^3$ , which divide the full space into two domains  $\Omega_1$  and  $\Omega_2$ . Point  $Q$  at position  $\mathbf{r}_Q$  is on  $\Psi$  (i.e.,  $\mathbf{r}_Q \in \Psi$ ), while two different points  $S$  at  $\mathbf{r}_S$  and  $E$  at  $\mathbf{r}_E$  are arbitrarily located in  $\mathbb{R}^3$  (see Figure B1). Vector  $\mathbf{n}_{21}(\mathbf{r}_Q)$  is a normal vector of surface  $\Psi$  at  $\mathbf{r}_Q$  pointing from  $\Omega_2$  to  $\Omega_1$ .  $R_S$  and  $R_E$  are the distance between  $S$  and  $C$ ,  $E$  and  $C$ , respectively. Then the 1st-order geometrical parameter  $K_{\Psi}^{(1)}(\mathbf{r}_E, \mathbf{r}_S)$  defined in (9) can be calculated as

$$\begin{aligned}
& -\frac{1}{2\pi} \iint_{\Psi} \frac{\partial(|\mathbf{r}_Q - \mathbf{r}_S|)}{\partial \mathbf{n}_{21}(\mathbf{r}_Q)} \cdot \frac{\mathbf{n}_{21}(\mathbf{r}_Q) d\Psi(\mathbf{r}_Q)}{|\mathbf{r}_Q - \mathbf{r}_S|^2 |\mathbf{r}_E - \mathbf{r}_Q|} \quad (\text{B1}) \\
& = \begin{cases} \frac{b}{R_S R_E} \sum_{n=0}^{\infty} \frac{2n}{2n+1} \left(\frac{b^2}{R_S R_E}\right)^n P_n(\cos \theta_C) & \text{if } R_S > b, R_E \geq b \\ \frac{1}{R_S} \sum_{n=0}^{\infty} \frac{2n}{2n+1} \left(\frac{R_E}{R_S}\right)^n P_n(\cos \theta_C) & \text{if } R_S > b, R_E \leq b \\ -\frac{1}{R_E} \sum_{n=0}^{\infty} \frac{1}{2n+1} \left(\frac{b}{R_E}\right)^n P_n(\cos \theta_C) & \text{if } R_S = b, R_E \geq b \\ -\frac{1}{b} \sum_{n=0}^{\infty} \frac{1}{2n+1} \left(\frac{R_E}{b}\right)^n P_n(\cos \theta_C) & \text{if } R_S = b, R_E \leq b \\ -\frac{1}{R_E} \sum_{n=0}^{\infty} \frac{2n+2}{2n+1} \left(\frac{R_S}{R_E}\right)^n P_n(\cos \theta_C) & \text{if } R_S < b, R_E \geq b \\ -\frac{1}{b} \sum_{n=0}^{\infty} \frac{2n+2}{2n+1} \left(\frac{R_S R_E}{b^2}\right)^n P_n(\cos \theta_C) & \text{else } R_S < b, R_E \leq b. \end{cases} \quad (\text{B2})
\end{aligned}$$

*Proof.* Firstly, we establish a spherical coordinates in  $\mathbb{R}^3$  originated at the center  $C$  of spherical surface  $\Psi$ . The position  $\mathbf{r} := (r, \theta, \varphi)$  is defined in spherical coordinates. For convenience, we consider  $S$  with coordinates  $\mathbf{r}_S := (R_S, 0, 0)$  on the positive  $z$ -axis, while  $E$  with coordinates  $\mathbf{r}_E := (R_E, \theta_C, 0)$  is placed on the plane  $\varphi = 0$ . Point  $Q$  with coordinates  $\mathbf{r}_Q := (b, \theta_Q, \varphi_Q)$  is an arbitrary point on  $\Psi$ . Angle  $\theta_C$  is the angle between line segment  $|SC|$  and  $|EC|$ ,  $\theta_Q$  is the angle between line segment  $|SC|$  and  $|QC|$ . Next, we follow a similar procedure as we did in Lemma 1, proving (B2) indirectly with an auxiliary physical model of charged spherical surface  $\Psi$  in vacuum.

### 2.1 Neither point $S$ nor $E$ is on spherical surface $\Psi$

Considering a charge density function  $q(\mathbf{r}_Q)$  on the spherical surface  $\Psi$ , as illustrated in Figure B1, we already know the electrical potential  $U(\mathbf{r}_E)$  is the key to give the proof from Lemma 1. Introduce an auxiliary point  $E'$  with coordinates  $\mathbf{r}_{E'} := (R_E, 0, 0)$  on positive  $z$ -axis, which satisfy  $|E'C| = |EC|$ . From (A2),  $U(\mathbf{r}_{E'})$  can be expressed as

$$U(\mathbf{r}_{E'}) = \frac{1}{4\pi\epsilon_0} \int_{-\pi}^{\pi} \int_0^{\pi} \frac{\partial(|\mathbf{r}_Q - \mathbf{r}_S|)}{\partial b} \frac{b^2 \sin\theta_Q d\theta_Q d\varphi_Q}{|\mathbf{r}_Q - \mathbf{r}_S|^2 |\mathbf{r}_{E'} - \mathbf{r}_Q|} \quad (\text{B3})$$

where  $|\mathbf{r}_Q - \mathbf{r}_S| = \sqrt{R_S^2 + b^2 - 2bR_S \cos\theta_Q}$  and  $|\mathbf{r}_{E'} - \mathbf{r}_Q| = \sqrt{R_E^2 + b^2 - 2bR_E \cos\theta_Q}$ . Equation (B3) can be further simplified as

$$U(\mathbf{r}_{E'}) = \begin{cases} \frac{1}{4\epsilon_0} \left( \frac{2b}{b^2 - R_S R_E} + \frac{1}{\sqrt{R_S R_E}} \ln \left( \frac{\sqrt{R_S R_E} + b}{\sqrt{R_S R_E} - b} \right) \right) & \text{if } R_S > b, R_E > b \\ \frac{1}{4\epsilon_0} \left( \frac{2}{R_E - R_S} + \frac{1}{\sqrt{R_S R_E}} \ln \left( \frac{\sqrt{R_S} + \sqrt{R_E}}{\sqrt{R_S} - \sqrt{R_E}} \right) \right) & \text{if } R_S > b, R_E < b \\ \frac{1}{4\epsilon_0} \left( \frac{2}{R_E - R_S} + \frac{1}{\sqrt{R_S R_E}} \ln \left( \frac{\sqrt{R_E} + \sqrt{R_S}}{\sqrt{R_E} - \sqrt{R_S}} \right) \right) & \text{if } R_S < b, R_E > b \\ \frac{1}{4\epsilon_0} \left( \frac{2b}{b^2 - R_S R_E} + \frac{1}{\sqrt{R_S R_E}} \ln \left( \frac{b + \sqrt{R_S R_E}}{b - \sqrt{R_S R_E}} \right) \right) & \text{if } R_S < b, R_E < b. \end{cases} \quad (\text{B4})$$

Expression (B4) can be rewritten using Taylor series as

$$U(\mathbf{r}_{E'}) = \begin{cases} -\frac{b}{2\epsilon_0 R_S R_E} \sum_{n=0}^{\infty} \frac{2n}{2n+1} \left( \frac{b^2}{R_S R_E} \right)^n & \text{if } R_S > b, R_E > b \\ -\frac{1}{2\epsilon_0 R_S} \sum_{n=0}^{\infty} \frac{2n}{2n+1} \left( \frac{R_E}{R_S} \right)^n & \text{if } R_S > b, R_E < b \\ \frac{1}{2\epsilon_0 R_E} \sum_{n=0}^{\infty} \frac{2n+2}{2n+1} \left( \frac{R_S}{R_E} \right)^n & \text{if } R_S < b, R_E > b \\ \frac{1}{2\epsilon_0 b} \sum_{n=0}^{\infty} \frac{2n+2}{2n+1} \left( \frac{R_S R_E}{b^2} \right)^n & \text{if } R_S < b, R_E < b. \end{cases} \quad (\text{B5})$$

Comparing (B5) and (A4), we have

$$\begin{cases} A_n = 0, B_n = -\frac{1}{2\epsilon_0} \frac{2n}{2n+1} \frac{b^{2n+1}}{R_S^{n+1}} & \text{if } R_S > b, R_E > b \\ A_n = -\frac{1}{2\epsilon_0} \frac{2n}{2n+1} \frac{1}{R_S^{n+1}}, B_n = 0 & \text{if } R_S > b, R_E < b \\ A_n = 0, B_n = \frac{1}{2\epsilon_0} \frac{2n+2}{2n+1} R_S^n & \text{if } R_S < b, R_E > b \\ A_n = \frac{1}{2\epsilon_0} \frac{2n+2}{2n+1} \frac{R_S^n}{b^{2n+1}}, B_n = 0 & \text{if } R_S < b, R_E < b. \end{cases} \quad (\text{B6})$$

Substituting (B6) to (A3) gives

$$U(\mathbf{r}_E) = U(\mathbf{r}_{E'}) P_n(\cos\theta_C). \quad (\text{B7})$$

**2.2 Either point  $S$  or  $E$  is on spherical surface  $\Psi$**  Next we consider the cases when  $R_S = b$  or  $R_E = b$ , which can be yield from the limit when  $R_S$  or  $R_E$  approaches  $b$  in (B7). The electrical potential on these singularity is defined as

$$U(\mathbf{r}_E) := \begin{cases} \lim_{\Delta \rightarrow 0} \frac{U(\mathbf{r}_E)|_{R_S=b+\Delta, R_E>b} + U(\mathbf{r}_E)|_{R_S=b-\Delta, R_E>b}}{2} & \text{if } R_S = b, R_E > b \\ \lim_{\Delta \rightarrow 0} \frac{U(\mathbf{r}_E)|_{R_S=b+\Delta, R_E<b} + U(\mathbf{r}_E)|_{R_S=b-\Delta, R_E<b}}{2} & \text{if } R_S = b, R_E < b \\ \lim_{\Delta \rightarrow 0} \frac{U(\mathbf{r}_E)|_{R_S>b, R_E=b+\Delta} + U(\mathbf{r}_E)|_{R_S>b, R_E=b-\Delta}}{2} & \text{if } R_S > b, R_E = b \\ \lim_{\Delta \rightarrow 0} \frac{U(\mathbf{r}_E)|_{R_S<b, R_E=b+\Delta} + U(\mathbf{r}_E)|_{R_S<b, R_E=b-\Delta}}{2} & \text{if } R_S < b, R_E = b \\ \lim_{\Delta \rightarrow 0} \frac{U(\mathbf{r}_E)|_{R_S=R_E=b+\Delta} + U(\mathbf{r}_E)|_{R_S=R_E=b-\Delta}}{2} & \text{if } R_S = b, R_E = b \end{cases} \quad (\text{B8})$$

Substituting (B5), (B7) into (B8) we have

$$U(\mathbf{r}_E) = \begin{cases} \frac{1}{2\varepsilon_0 R_E} \sum_{n=0}^{\infty} \frac{1}{2n+1} \left(\frac{b}{R_E}\right)^n P_n(\cos \theta_C) & \text{if } R_S = b, R_E > b \\ \frac{1}{2\varepsilon_0 b} \sum_{n=0}^{\infty} \frac{1}{2n+1} \left(\frac{R_E}{b}\right)^n P_n(\cos \theta_C) & \text{if } R_S = b, R_E < b \\ -\frac{1}{2\varepsilon_0 R_S} \sum_{n=0}^{\infty} \frac{2n}{2n+1} \left(\frac{b}{R_S}\right)^n P_n(\cos \theta_C) & \text{if } R_S > b, R_E = b \\ \frac{1}{2\varepsilon_0 b} \sum_{n=0}^{\infty} \frac{2n+2}{2n+1} \left(\frac{R_S}{b}\right)^n P_n(\cos \theta_C) & \text{if } R_S < b, R_E = b \\ \frac{1}{2\varepsilon_0 b} \sum_{n=0}^{\infty} \frac{1}{2n+1} P_n(\cos \theta_C) & \text{if } R_S = b, R_E = b. \end{cases} \quad (\text{B9})$$

One can find (B2) equating the right hand sides of (B7), (B9) and (A2).

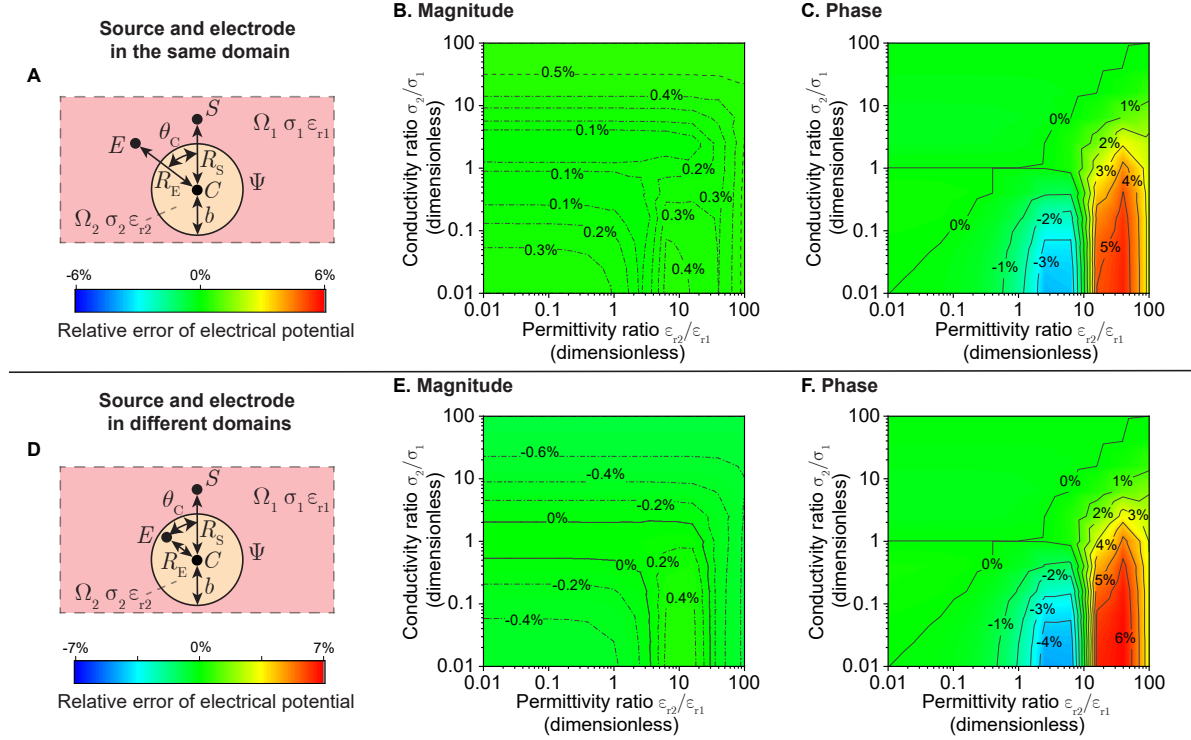

**Figure B2.** Relative error distribution of electrical potential between theory and FEM with varying nonhomogeneous electrical property in case study 2. A spherical surface  $\Psi$  with radius  $b$  centered at point  $C$  divides full space into two domain  $\Omega_1$  and  $\Omega_2$  with conductivity  $\sigma_{\{1,2\}}$  and relative permittivity  $\varepsilon_{\{r1,r2\}}$ , respectively. Sinusoidal current ( $I = 20$  nA of 1 kHz) source  $S$  and potential recording electrode  $E$  are placed in the same domain (A) and in different domains (D). Angle  $\theta_C$  is the angle between of line segment  $|EC|$  and  $|SC|$ , and  $R_S$ ,  $R_E$  are distance from  $S$ ,  $E$  to point  $C$ , respectively. Relative error distributions of potential magnitude and phase when  $E$  in  $\Omega_1$  with  $R_E = 8$  mm (B, C) and  $E$  in  $\Omega_2$  with  $R_E = 3$  mm (E, F) changing the conductivity  $\sigma_2 = [0.01 \cdot \sigma_1, 100 \cdot \sigma_1]$  and relative permittivity  $\varepsilon_{r2} = [0.01 \cdot \varepsilon_{r1}, 100 \cdot \varepsilon_{r1}]$ . Additional simulation parameters:  $b = 5$  mm,  $R_S = 10$  mm,  $\theta_C = 90^\circ$ ,  $\sigma_1 = 0.431$  S/m,  $\varepsilon_1 = 8.67 \times 10^5$  (dimensionless).

### Part C. Accuracy analysis

We proposed (9) to calculate the 1st-order approximated electrical potential in a nonhomogeneous conducting volume. Therefore, the accuracy of the approximation is

determined by how electrically similar or different the tissues within the domain are. Here, we compare the 1st-order approximation with finite element model simulation considering the same case study 1 and 2 to assess the accuracy when varying the tissues' electrical properties.

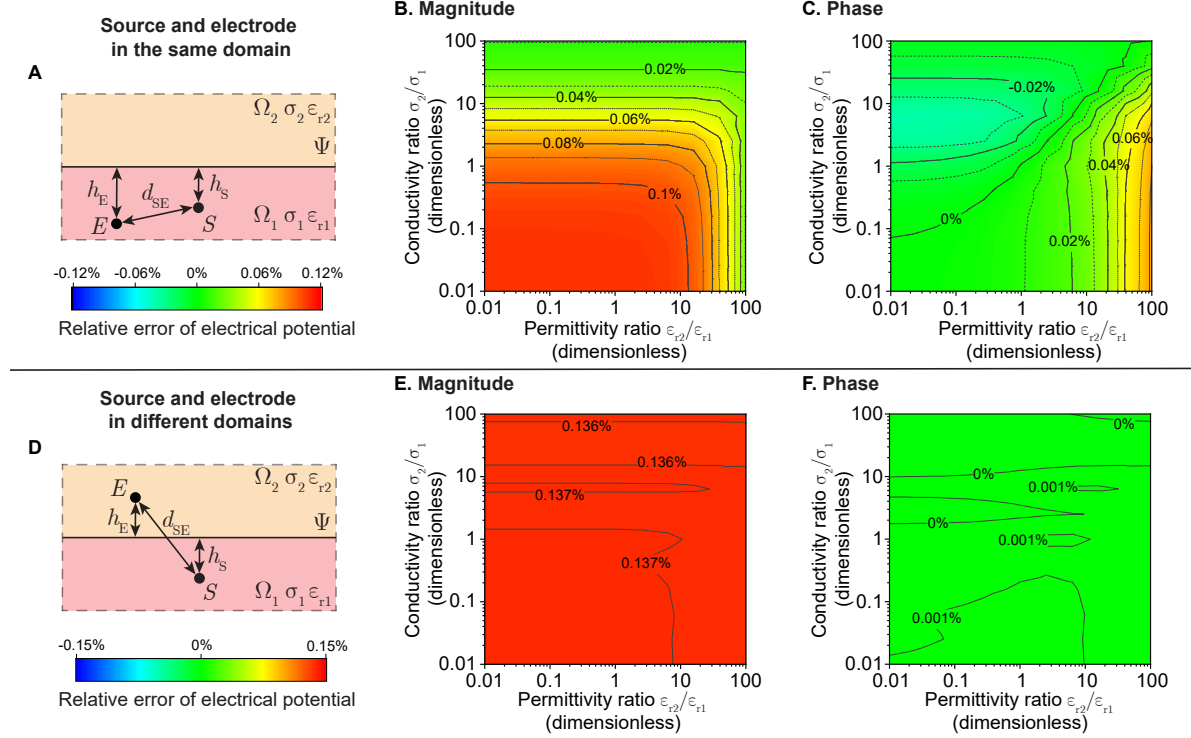

**Figure C1.** Relative error distribution of electrical potential between theory and FEM with varying nonhomogeneous electrical property in case study 1. A plane  $\Psi$  divides full space into two domain  $\Omega_1$  and  $\Omega_2$  with conductivity  $\sigma_{\{1,2\}}$  and relative permittivity  $\varepsilon_{\{r1,r2\}}$ , respectively. Sinusoidal current ( $I = 20$  nA at 1 kHz) source  $S$  and potential recording electrode  $E$  are placed in the same domain (A) and in different domains (D). Distance  $d_{SE}$  is the length of line segment  $|SE|$ , and  $h_S$ ,  $h_E$  are distance from  $S$ ,  $E$  to boundary  $\Psi$ , respectively. Relative error distributions of potential magnitude and phase when  $E$  in  $\Omega_1$  with  $d_{SE} = 10$  mm (B, C) and  $E$  in  $\Omega_2$  with  $d_{SE} = 15$  mm (E, F) changing the conductivity  $\sigma_2 = [0.01 \cdot \sigma_1, 100 \cdot \sigma_1]$  and relative permittivity  $\varepsilon_{r2} = [0.01 \cdot \varepsilon_{r1}, 100 \cdot \varepsilon_{r1}]$ . Additional simulation parameters:  $h_S = h_E = 5$  mm,  $\sigma_1 = 0.431$  S/m,  $\varepsilon_1 = 8.67 \times 10^5$  (dimensionless).

### 3.1 Simulation configuration

A surface  $\Psi$  divide full space into two domain  $\Omega_{\{1,2\}}$  with conductivity  $\sigma_{\{1,2\}}$  and relative permittivity  $\varepsilon_{\{r1,r2\}}$ , respectively. The electrical property in  $\Omega_1$  is that of isotropic muscle, i.e.,  $\sigma_1 = 4.31 \times 10^{-1}$  S/m,  $\varepsilon_{r1} = 8.67 \times 10^5$  (dimensionless), while the electrical property in  $\Omega_2$  changes as  $\sigma_2 = [0.01 \cdot \sigma_1, 100 \cdot \sigma_1]$ ,  $\varepsilon_2 = [0.01 \cdot \varepsilon_1, 100 \cdot \varepsilon_1]$ . A point-like source  $S$  located in  $\Omega_1$  generating sinusoidal current ( $I=20$  nA at 1 kHz). An electrode  $E$  records the electrical potential  $U$ . To evaluate the accuracy, we define the magnitude error  $e_{\text{mag}} := (|U_{\text{Theory}}| - |U_{\text{FEM}}|) / |U_{\text{FEM}}|$  and phase error  $e_{\text{phase}} := (\text{Arg}\{U_{\text{Theory}}\} - \text{Arg}\{U_{\text{FEM}}\}) / \text{Arg}\{U_{\text{FEM}}\}$  of electrical potential, where  $\text{Arg}\{\cdot\}$  is the argument of a complex value.



In case study 1, the potential recording electrode  $E$  can be placed in domain  $\Omega_1$  (see Figure C1 A) and in  $\Omega_2$  (see Figure C1 D). Geometrical parameters are set as constants: distance  $d_{SE} = 10$  mm is the length of line segment  $|SE|$ , and  $h_S = 5$  mm,  $h_E = 5$  mm are distance from  $S$ ,  $E$  to planar boundary  $\Psi$ , respectively.

In case study 2, boundary  $\Psi$  is a spherical surface with radius  $b = 5$  mm, and length  $R_S = 10$  mm,  $R_E$  are distance from  $S$ ,  $E$  to spherical center point  $C$ . Electrode  $E$  can also be placed in domain  $\Omega_1$  with  $R_E = 8$  mm (see Figure B2 A) and in  $\Omega_2$  with  $R_E = 3$  mm (see Figure B2 D). Angle  $\theta_C = 90^\circ$  is the angle between of line segment  $|EC|$  and  $|SC|$ .

### 3.2. Accuracy

Figure C1 and B2 plot the accuracy of the 1st-order electrical potential predictions compared to FEM simulation in case study 1 and 2, respectively. The conductivity and relative permittivity properties in domain  $\Omega_2$  change from 0.01 to 100 times to that in  $\Omega_1$  while keeping the geometrical parameters constants. The relative error of magnitude and phase are shown when electrode  $E$  located in domain  $\Omega_1$  (Figure C1 B and C in case study 1, Figure B2 B and C in case study 2) and in  $\Omega_2$  (Figure C1 E and F in case study 1, Figure B2 E and F in case study 2). The relative errors for magnitude and phase are  $\leq 0.14\%$ ,  $\leq 0.09\%$  in case study 1, and  $\leq 0.8\%$ ,  $\leq 7\%$  in case study 2, respectively. Of note, when electrical property in domain  $\Omega_2$  is set as fat (i.e.,  $\sigma_2/\sigma_1 = 0.052$  and  $\varepsilon_2/\varepsilon_1 = 0.028$ ), the relative errors of magnitude and phase of electrical potential are both  $\leq 0.5\%$ .
